# Supplementary material for: Palladium(ii) mononuclear and palladium(ii)/ruthenium(ii) heterodinuclear complexes containing 2-quinolyl-substituted (pyridine-2-carbonyl)hydrazone
Source: Royal Society of Chemistry journal article supplement (doi:10.1039/c5dt02345a), 2015-01-01
Supplement: c5dt02345a1.pdf [file c5dt02345a1.pdf]

## Electronic Supplementary Information

### Palladium(II) mononuclear and palladium(II)/ruthenium(II) heterodinuclear complexes containing 2-quinolyl-substituted (pyridine-2-carbonyl)hydrazone

Asami Mori,<sup>a</sup> Takayoshi Suzuki,<sup>a,b,\*</sup> Yuichi Nakatani,<sup>a</sup> Yukinari Sunatsuki,<sup>a</sup> Masaaki Kojima<sup>a</sup> and Kiyohiko Nakajima<sup>c,\*</sup>

<sup>a</sup> Department of Chemistry, Faculty of Science, Okayama University, Okayama 700-8530, Japan.

E-mail: suzuki@okayama-u.ac.jp; fax: +81-86-251-7900

<sup>b</sup> Photosynthesis Research Center, Graduate School of Natural Science and Technology, Okayama University, Okayama 700-8530, Japan.

<sup>c</sup> Department of Chemistry, Aichi University of Education, Kariya, Aichi 448-8542, Japan.

E-mail: knakajim@aeu.ac.jp

### Experimental details

*General:* All reagents and solvents were commercially available and used without further purification. The starting materials, [PdCl<sub>2</sub>(cod)]<sup>1</sup> and HL<sup>2</sup>, were prepared according to the literature methods. A mixture of *E*- and *Z*-isomers (58:42) of HL was used for preparation of the palladium(II) complexes.

### Synthesis of complexes

**[PdCl<sub>2</sub>{L-κN(quinoline),κN(hydrazone),κN(pyridine)}] (1):** To an acetonitrile solution (15 mL) of a mixture of *E*- and *Z*-isomers of HL (96.7 mg, 0.35 mmol) was added Et<sub>3</sub>N (48.7 μL, 0.35 mmol) and [PdCl<sub>2</sub>(cod)] (99.9 mg, 0.35 mmol); the mixture was stirred to dissolve [PdCl<sub>2</sub>(cod)] completely. Then, the mixture was allowed to stand for several days at room temperature. The reddish crystalline product precipitated was collected by filtration and dried in air. Yield: 140 mg (96%). Anal. Calcd for C<sub>16</sub>H<sub>11</sub>ClN<sub>4</sub>OPd: C, 46.07; H, 2.66; N, 13.43%. Found: C, 45.99; H, 2.09; N, 13.37%. <sup>1</sup>H NMR (CDCl<sub>3</sub>): δ 9.38 (d, *J* = 5.6 Hz, 1H), 9.35 (d, *J* = 8.8 Hz, 1H), 8.34 (d, *J* = 8.3 Hz, 1H), 8.22 (d, *J* = 7.7 Hz, 1H), 8.09 (td, *J* = 7.6, 1.5 Hz, 1H), 7.81 (ddd, *J* = 8.0, 6.3, 1.6 Hz, 1H), 7.78 (d, *J* = 6.8 Hz, 1H), 7.64 (ddd, *J* = 5.3, 4.2, 3.7 Hz, 1H), 7.60 (ddd, *J* = 7.5, 5.7, 1.7 Hz, 1H), 7.57 (d, *J* = 8.3 Hz, 1H), 7.48 (s, 1H, azomethine-H). The single-crystals of 1•0.5CH<sub>3</sub>CN suitable for X-ray analysis were directly picked up from the reaction solution, and those of 1•0.5CH<sub>2</sub>Cl<sub>2</sub> were obtained from a dichloromethane solution of 1 by slow evaporation at ambient temperature.

**[PdCl<sub>2</sub>{HL'-κN(hydrazone),κN(pyridine)}] (2):** Solid [PdCl<sub>2</sub>(cod)] (37.5 mg, 0.13

mmol) was added to an acetonitrile solution (8.5 mL) of a mixture of *E*- and *Z*-isomers of HL (36.2 mg, 0.13 mmol), and the mixture was stirred to dissolve [PdCl<sub>2</sub>(cod)] completely. To the reaction mixture was diffused diisopropyl ether vapor. After 1 d at ambient temperature yellow platelet crystals of **2**•0.5CH<sub>3</sub>CN•H<sub>2</sub>O were obtained as well as reddish crystalline solids of **1**•0.5CH<sub>3</sub>CN. These crystals were separated under the microscope and used for X-ray analysis and spectroscopic measurements. Because of the poor solubility of **2** in common (deuterated) organic solvents, <sup>1</sup>H NMR spectrum of **2** could not be measured.

***trans*(Cl,Cl)-[PdCl(μ-L)RuCl<sub>2</sub>(PPh<sub>3</sub>)<sub>2</sub>] (3):** Complex **1** (41.7 mg, 0.10 mmol) was dissolved in dichloromethane (15 mL) on heating, and [RuCl<sub>2</sub>(PPh<sub>3</sub>)<sub>3</sub>] (95.9 mg, 0.10 mmol) was then added to the solution. After stirring the mixture for 3 h at room temperature, the solvent was evaporated (to ca. 5 mL) under reduced pressure. Hexane (15 mL) was added to the concentrate, affording a green precipitate, which was collected by filtration and dried in air. Yield: 110 mg (99%). Anal. Calcd for C<sub>52</sub>H<sub>41</sub>Cl<sub>3</sub>N<sub>4</sub>OP<sub>2</sub>PdRu•0.5CH<sub>2</sub>Cl<sub>2</sub>: C, 54.54; H, 3.66; N, 4.85%. Found: C, 54.66; H, 3.48; N, 4.69%. <sup>1</sup>H NMR (CDCl<sub>3</sub>): δ 9.19 (d, *J* = 8.4 Hz, 2H), 8.00 (d, *J* = 8.1 Hz, 1H), 7.97 (td, *J* = 1.4, 7.8 Hz, 1H), 7.80 (dd, *J* = 4.9, 1.7 Hz, 1H), 7.80 (t, *J* = 5.2 Hz, 1H), 7.69 (t, *J* = 7.2 Hz, 4H), 7.59 (t, *J* = 8.1 Hz, 6H), 7.53 (t, *J* = 6.7 Hz, 1H), 7.44 (ddd, *J* = 9.8, 8.5, 1.3 Hz, 6H), 7.17 (t, *J* = 4H), 7.06 (dd, *J* = 11.2, 1.6 Hz, 6H), 7.06 (td, *J* = 13.5, 1.9 Hz, 6H), 6.86 (t, *J* = 6.8 Hz, 1H), 6.30 (d, *J* = 8.5 Hz, 1H) ppm. <sup>31</sup>P NMR (CDCl<sub>3</sub>): δ = 47.27 (d, *J*<sub>P,P</sub> = 35 Hz), 37.79 (d). Green prismatic crystals suitable for X-ray analysis were deposited by slow diffusion of layered hexane into a dichloromethane solution of the crude product.

## Measurements

Proton and phosphorus-31 NMR spectra were recorded on a Varian NMR System 400-MR spectrometers. The <sup>1</sup>H and <sup>31</sup>P NMR chemical shifts were referenced to the residual solvent peak and the external 85% H<sub>3</sub>PO<sub>4</sub>, respectively. Cyclic voltammograms were measured using a BAS 100B/W electrochemical workstation with dichloromethane solutions containing Bu<sub>4</sub>NClO<sub>4</sub> (0.1 M) as a supporting electrolyte, at scan rate of 100 mV s<sup>-1</sup>. The three-electrode system consisting of a glassy carbon working, a platinum wire auxiliary, and an Ag/Ag<sup>+</sup> (Ag/0.01 M AgNO<sub>3</sub>) reference electrodes were used. UV-vis absorption spectra were recorded on a Jasco V-550 spectrophotometer.

## Crystallography

Each single-crystal of complexes **1**•0.5CH<sub>3</sub>CN, **1**•0.5CH<sub>2</sub>Cl<sub>2</sub> and **3**•2CH<sub>2</sub>Cl<sub>2</sub> was glued on a top of glass fiber. The X-ray diffraction data were obtained at 25(1) °C using a Rigaku SCXmini CCD detector with graphite-monochromated Mo Kα radiation (λ = 0.71073 Å). A single-crystal of complex **2**•0.5CH<sub>3</sub>CN•H<sub>2</sub>O was mounted with a cryoloop and flash cooled using a cold nitrogen

stream. The X-ray diffraction data were obtained at  $-110(1)$  °C using a Rigaku VariMax diffractometer with a Saturn CCD detector. The data were processed using the Process-Auto or the CrystalClear software package,<sup>3</sup> and the numerical absorption corrections were applied.<sup>4</sup> The structures were solved using the direct method employing the SIR2004, SIR2011,<sup>5</sup> or SHELXS97<sup>6</sup> software package and refined on  $F^2$  (with all independent reflections) using the SHELXL97 or SHELXL2013 software package.<sup>6</sup> All non-H atoms were refined anisotropically. In the analyses for **1**•0.5CH<sub>3</sub>CN and **1**•0.5CH<sub>2</sub>Cl<sub>2</sub> all H-atoms were refined isotropically, while those of **3**•2CH<sub>2</sub>Cl<sub>2</sub> were placed at the theoretical positions and treated using riding models. For the analysis of **2**•CH<sub>3</sub>CN•H<sub>2</sub>O, the quinolinium H-atom was located in a D-synthesis map and refined isotropically, but the other H-atoms in the complex molecule were theoretically introduced and treated using riding models. H atoms of the solvated CH<sub>3</sub>CN and H<sub>2</sub>O molecules were not included in the calculation. All calculations were carried out using the CrystalStructure software package.<sup>7</sup>

The crystal data are collected in Table S1, and selected structural parameters are listed in Table S2.

## References

- 1 D. Drew, J. R. Doyle, *Inorg. Synth.* **1972**, *13*, 47–55.
- 2 A. Mori, T. Suzuki, Y. Sunatsuki, A. Kobayashi, M. Kato, M. Kojima, K. Nakajima, *Eur. J. Inorg. Chem.* **2014**, 186–197.
- 3 (a) Rigaku Co. Ltd., *Process–Auto, Automatic Data Acquisition and Processing Package for Imaging Plate Diffractometer*, Akishima, Tokyo, **1998**. (b) Rigaku Co. Ltd., *CrystalClear, Operating Software for the CCD Detector System*, Akishima, Tokyo, **2008**.
- 4 (a) Rigaku Co. Ltd., *SHAPE*, Akishima, Tokyo, Japan, **1999**. (b) Rigaku Co. Ltd., *NUMABS*, Akishima, Tokyo, **1999**. (c) Rigaku Co. Ltd., *REQAB*, Akishima, Tokyo, **1998**.
- 5 (a) M. C.Burla, R. Caliendo, M. Camalli, B. Carrozzini, G. L. Cascarano, L. De Caro, C. Giacovazzo, G. Polidori, R. Spagna, *J. Appl. Crystallogr.* **2005**, *38*, 381–388. (b) M. C.Burla, R. Caliendo, M. Camalli, B. Carrozzini, G. L. Cascarano, L. De Caro, C. Giacovazzo, G. Polidori, D. Siliqi, R. Spagna, *J. Appl. Crystallogr.* **2007**, *40*, 609–613. (c) M. C.Burla, R. Caliendo, M. Camalli, B. Carrozzini, G. L. Cascarano, C. Giacovazzo, M. Mallamo, A. Mazzone, G. Polidori, R. Spagna, *J. Appl. Crystallogr.* **2012**, *45*, 357–361.
- 6 G. M. Sheldrick, *Acta Crystallogr. Sect. A* **2008**, *64*, 112–122.
- 7 Rigaku Co. Ltd., *CrystalStructure*, Tokyo, **2000–2014**.

**Table S1.** Crystallographic Data

| Abbreviation                                                                                | <b>1•0.5CH<sub>3</sub>CN</b>                                           | <b>1•0.5CH<sub>2</sub>Cl<sub>2</sub></b>                             | <b>2•0.5CH<sub>3</sub>CN•H<sub>2</sub>O</b>                                          | <b>3•2CH<sub>2</sub>Cl<sub>2</sub></b>                                              |
|---------------------------------------------------------------------------------------------|------------------------------------------------------------------------|----------------------------------------------------------------------|--------------------------------------------------------------------------------------|-------------------------------------------------------------------------------------|
| Formula                                                                                     | C <sub>17</sub> H <sub>12.5</sub> Cl <sub>2</sub> N <sub>4.5</sub> OPd | C <sub>16.5</sub> H <sub>12</sub> Cl <sub>2</sub> N <sub>4</sub> OPd | C <sub>17</sub> H <sub>15.5</sub> Cl <sub>2</sub> N <sub>4.5</sub> O <sub>2</sub> Pd | C <sub>54</sub> H <sub>45</sub> Cl <sub>7</sub> N <sub>4</sub> OP <sub>2</sub> PdRu |
| <i>FW</i>                                                                                   | 437.67                                                                 | 459.61                                                               | 492.14                                                                               | 1283.56                                                                             |
| <i>T</i> / K                                                                                | 298(1)                                                                 | 298(1)                                                               | 163(1)                                                                               | 298(1)                                                                              |
| Colour, shape                                                                               | Orange, prism                                                          | Orange, prism                                                        | Yellow, platelet                                                                     | Green, prism                                                                        |
| Crystal size / mm                                                                           | 0.20 × 0.13 × 0.06                                                     | 0.30 × 0.30 × 0.20                                                   | 0.20 × 0.10 × 0.02                                                                   | 0.30 × 0.20 × 0.10                                                                  |
| Crystal system                                                                              | Monoclinic                                                             | Monoclinic                                                           | Monoclinic                                                                           | Triclinic                                                                           |
| Space group, <i>Z</i>                                                                       | <i>C2/c</i> , 8                                                        | <i>C2/c</i> , 8                                                      | <i>C2/c</i> , 8                                                                      | <i>P1</i> , 2                                                                       |
| <i>a</i> / Å                                                                                | 10.9736(2)                                                             | 22.4138(4)                                                           | 27.991(6)                                                                            | 10.7286(5)                                                                          |
| <i>b</i> / Å                                                                                | 13.3638(2)                                                             | 9.6592(2)                                                            | 7.563(2)                                                                             | 15.3170(8)                                                                          |
| <i>c</i> / Å                                                                                | 21.7523(4)                                                             | 17.3560(3)                                                           | 17.189(6)                                                                            | 17.1968(9)                                                                          |
| <i>α</i> / deg.                                                                             | 90                                                                     | 90                                                                   | 90                                                                                   | 93.998(2)                                                                           |
| <i>β</i> / deg.                                                                             | 90.796(1)                                                              | 118.589(1)                                                           | 95.354(15)                                                                           | 101.667(1)                                                                          |
| <i>γ</i> / deg.                                                                             | 90                                                                     | 90                                                                   | 90                                                                                   | 91.621(2)                                                                           |
| <i>V</i> / Å <sup>3</sup>                                                                   | 3189.65(10)                                                            | 3299.42(11)                                                          | 3623.0(18)                                                                           | 2758.2(2)                                                                           |
| <i>D<sub>x</sub></i> / Mg m <sup>-3</sup>                                                   | 1.823                                                                  | 1.675                                                                | 1.814                                                                                | 1.545                                                                               |
| <i>F</i> (000)                                                                              | 1736                                                                   | 1816                                                                 | 1960                                                                                 | 1288                                                                                |
| <i>μ</i> (Mo K <sub>α</sub> ) / mm <sup>-1</sup>                                            | 1.345                                                                  | 1.461                                                                | 1.346                                                                                | 1.039                                                                               |
| <i>T</i> <sub>min</sub> , <i>T</i> <sub>max</sub>                                           | 0.775, 0.9248                                                          | 0.697, 0.782                                                         | 0.852, 0.973                                                                         | 0.746, 0.903                                                                        |
| <i>R</i> <sub>int</sub>                                                                     | 0.0327                                                                 | 0.0158                                                               | 0.0314                                                                               | 0.0721                                                                              |
| Refln./param. ratio                                                                         | 3663/276                                                               | 3761/271                                                             | 4140/253                                                                             | 12577/631                                                                           |
| <i>R</i> 1 [ <i>F</i> <sub>o</sub> <sup>2</sup> > 2σ( <i>F</i> <sub>o</sub> <sup>2</sup> )] | 0.0255                                                                 | 0.0202                                                               | 0.0355                                                                               | 0.0647                                                                              |
| <i>wR</i> 2 (all refln)                                                                     | 0.0596                                                                 | 0.0532                                                               | 0.0966                                                                               | 0.1525                                                                              |
| GoF                                                                                         | 1.051                                                                  | 1.086                                                                | 1.099                                                                                | 1.054                                                                               |

**Table S2.** Selected structural parameters of complexes **1**, **2**, **3** and the related Ru complex, **4**.<sup>a</sup>

|                                                    | <b>1</b> •0.5CH <sub>3</sub> CN | <b>1</b> •0.5CH <sub>2</sub> Cl <sub>2</sub> | <b>2</b> •0.5CH <sub>3</sub> CN•H <sub>2</sub> O | <b>3</b> •2CH <sub>2</sub> Cl <sub>2</sub> | <b>4</b> |
|----------------------------------------------------|---------------------------------|----------------------------------------------|--------------------------------------------------|--------------------------------------------|----------|
| Pd1—Cl1 (Cl3 for <b>3</b> )                        | 2.3359(6)                       | 2.3391(5)                                    | 2.2956(11)                                       | 2.3140(18)                                 | —        |
| Pd1—Cl2                                            | —                               | —                                            | 2.3145(12)                                       | —                                          | —        |
| Pd1—N1                                             | 2.0438(18)                      | 2.0379(16)                                   | —                                                | 2.036(4)                                   | —        |
| Pd1—N3                                             | 1.9669(18)                      | 1.9660(15)                                   | 2.071(2)                                         | 1.983(5)                                   | —        |
| Pd1—N4                                             | 2.0361(18)                      | 2.0393(16)                                   | 2.020(3)                                         | 2.034(5)                                   | —        |
| Ru1—Cl1                                            | —                               | —                                            | —                                                | 2.4150(16)                                 | 2.430(1) |
| Ru1—Cl2                                            | —                               | —                                            | —                                                | 2.4113(17)                                 | 2.400(1) |
| Ru1—P1                                             | —                               | —                                            | —                                                | 2.3172(13)                                 | 2.313(1) |
| Ru1—P2                                             | —                               | —                                            | —                                                | 2.3369(15)                                 | 2.331(1) |
| Ru1—O1                                             | —                               | —                                            | —                                                | 2.133(4)                                   | 2.163(3) |
| Ru1—N2                                             | —                               | —                                            | —                                                | 2.146(5)                                   | 2.143(4) |
| O1—C11                                             | 1.212(3)                        | 1.216(2)                                     | 1.238(4)                                         | 1.250(7)                                   | 1.245(6) |
| N3—C11                                             | 1.378(3)                        | 1.375(2)                                     | 1.367(4)                                         | 1.336(7)                                   | 1.341(6) |
| N3—Pd1—Cl1 (Cl3)                                   | 168.85(6)                       | 169.24(5)                                    | 166.26(14)                                       | 166.26(14)                                 | —        |
| N4—Pd1—Cl2                                         | —                               | —                                            | 176.65(8)                                        | —                                          | —        |
| N1—Pd1—N4                                          | 171.20(7)                       | 169.28(6)                                    | —                                                | 171.87(19)                                 | —        |
| $\tau_4^a$                                         | 0.14                            | 0.15                                         | 0.12                                             | 0.15                                       | —        |
| plane(CAH) <sup>b</sup> vs. plane(qn) <sup>c</sup> | 27.0(1)                         | 29.6(1)                                      | 2.3(1)                                           | 20.4(2)                                    | 16.5(2)  |
| plane(CAH) vs. plane(py) <sup>d</sup>              | 15.9(1)                         | 18.9(1)                                      | 2.4(1)                                           | 12.2(3)                                    | 3.2(2)   |
| plane(qn) vs. plane(py)                            | 41.22(7)                        | 45.6(1)                                      | 3.9(1)                                           | 31.1(2)                                    | 18.5(2)  |

<sup>a</sup>Ref. 1. <sup>b</sup>Defined by N2, N3, C11 and O1. <sup>c</sup>Defined by N1, C1, C2, C3, C4, C5, C6, C7, C8, and C9. <sup>d</sup>Defined by N4, C12, C13, C14, C15 and C16.

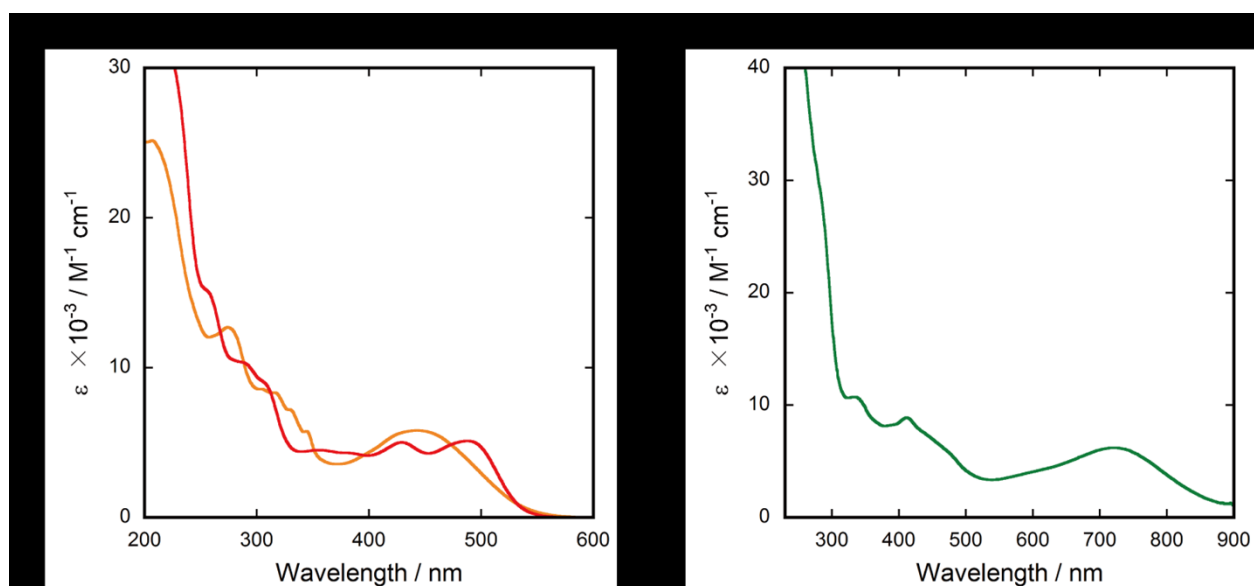

**Figure S1** Absorption spectra of (a) complexes **1** (red) and **2** (orange) and (b) complex **3** (green) in acetonitrile at room temperature (~25 °C).

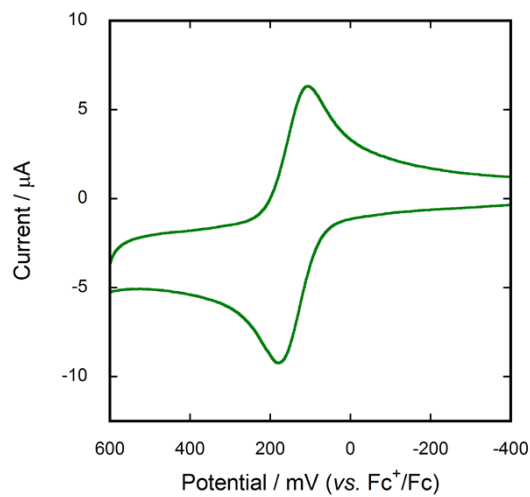

**Figure S2** Cyclic voltammogram of complex **3** in dichloromethane at room temperature (~25 °C).  $\Delta E_p = 75 \text{ mV}$  ( $\Delta E_p = E_{pa} - E_{pc}$ ).

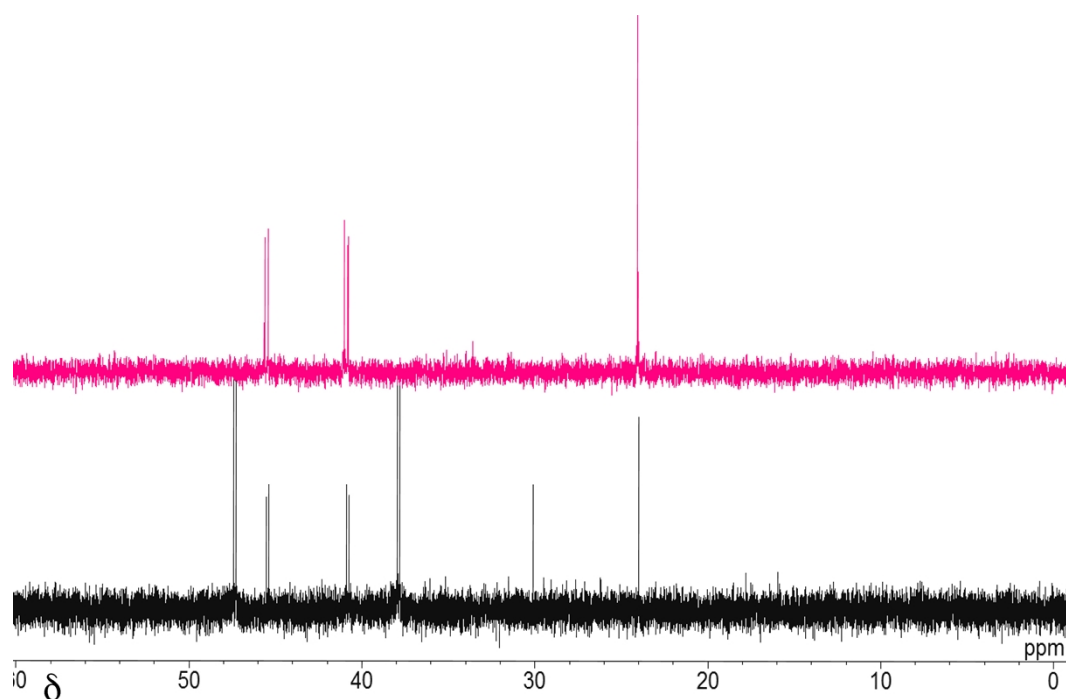

**Figure S3.**  $^{31}\text{P}$  NMR spectra of complex **3** in  $\text{CDCl}_3$ . Lower (black) spectrum was measured after ca. 1 h when a crude reaction product from complex **1** and  $[\text{RuCl}_2(\text{PPh}_3)_3]$  in dichloromethane for 3 h (see: Experimental section) was dissolved in  $\text{CDCl}_3$ . Upper (purple) was a spectrum of a prolonged ( $\sim 10$  h) reaction product from the same precursors in dichloromethane.
